# Supplementary material
Source: PubMed Central journal article supplement (PMC3086263)
Supplement: NIHMS287036-supplement-03.pdf [file NIHMS287036-supplement-03.pdf]

Tsutakawa et al  
Fig S1

**A**

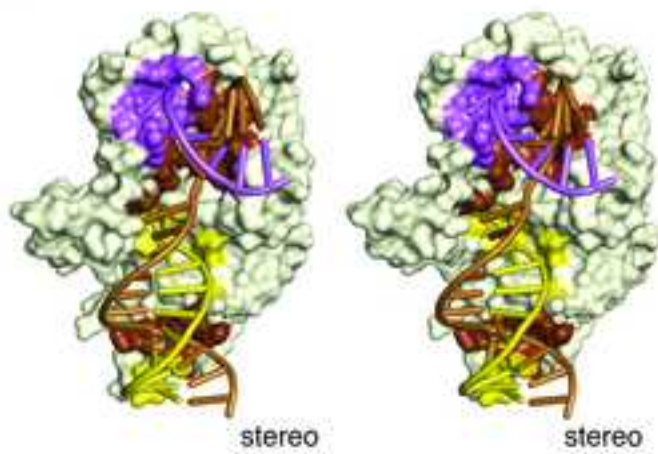

**B**

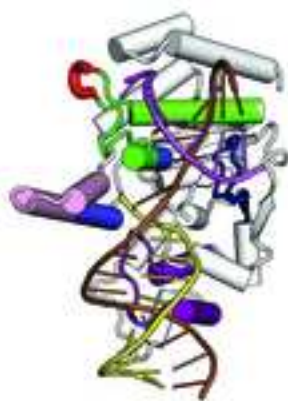

**C**

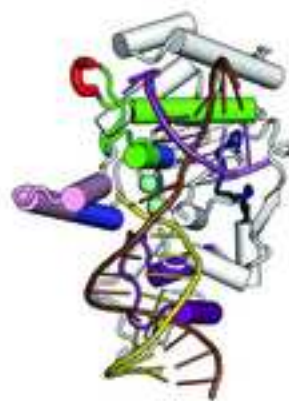

**D**

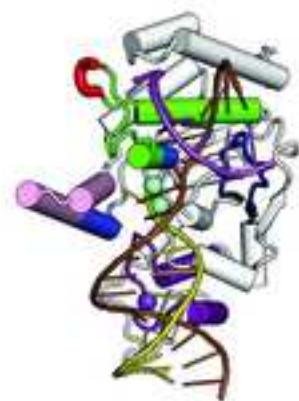

Tsutakawa et al  
Fig S2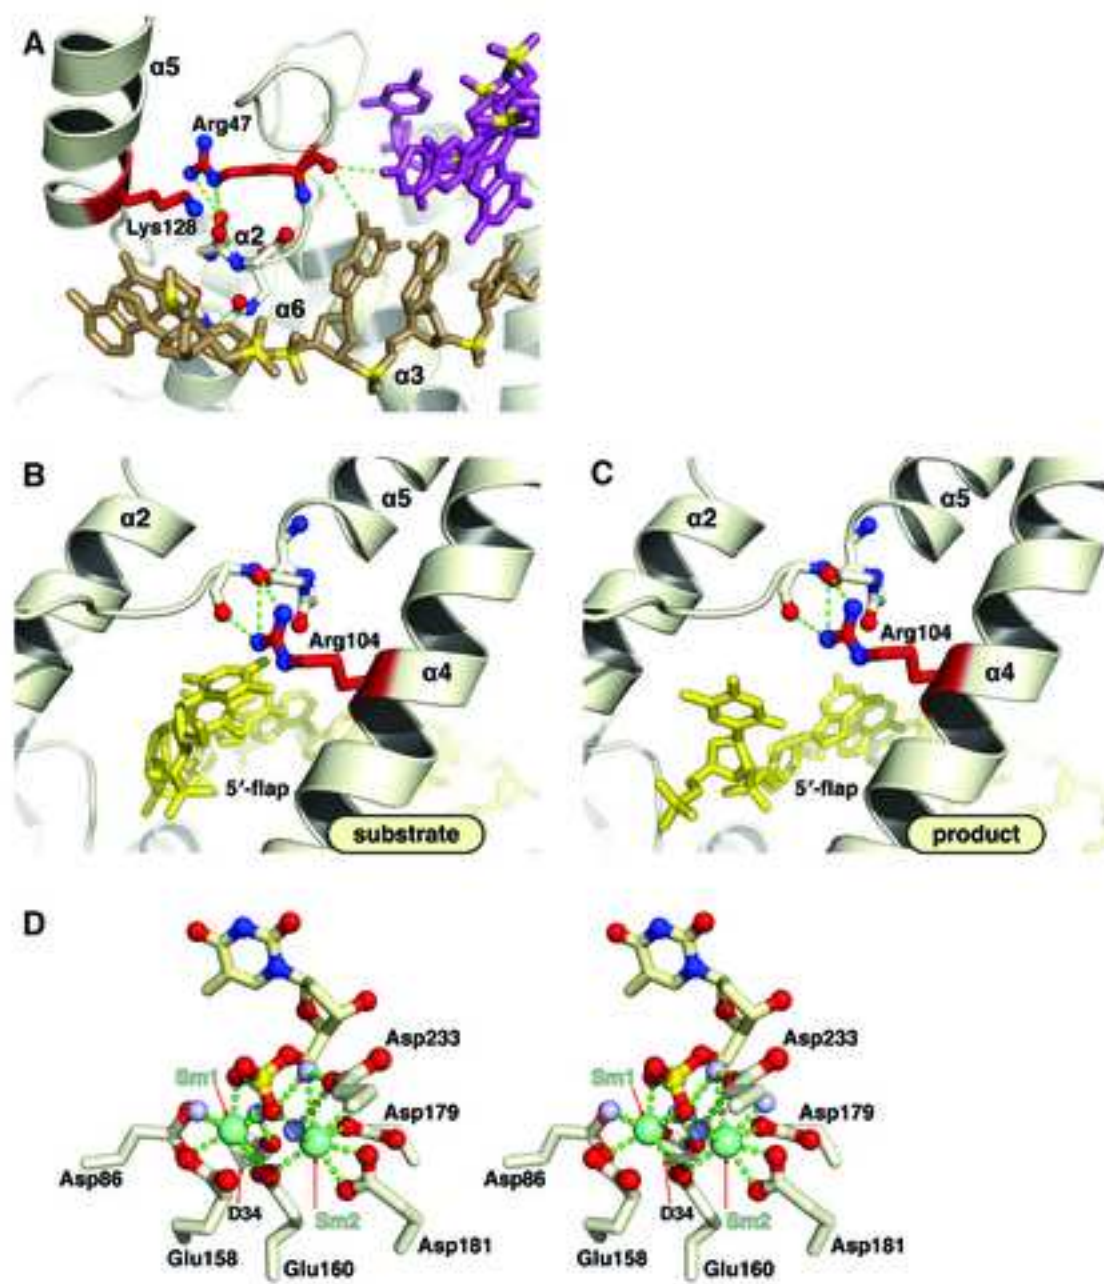

Tsutakawa et al  
Fig S3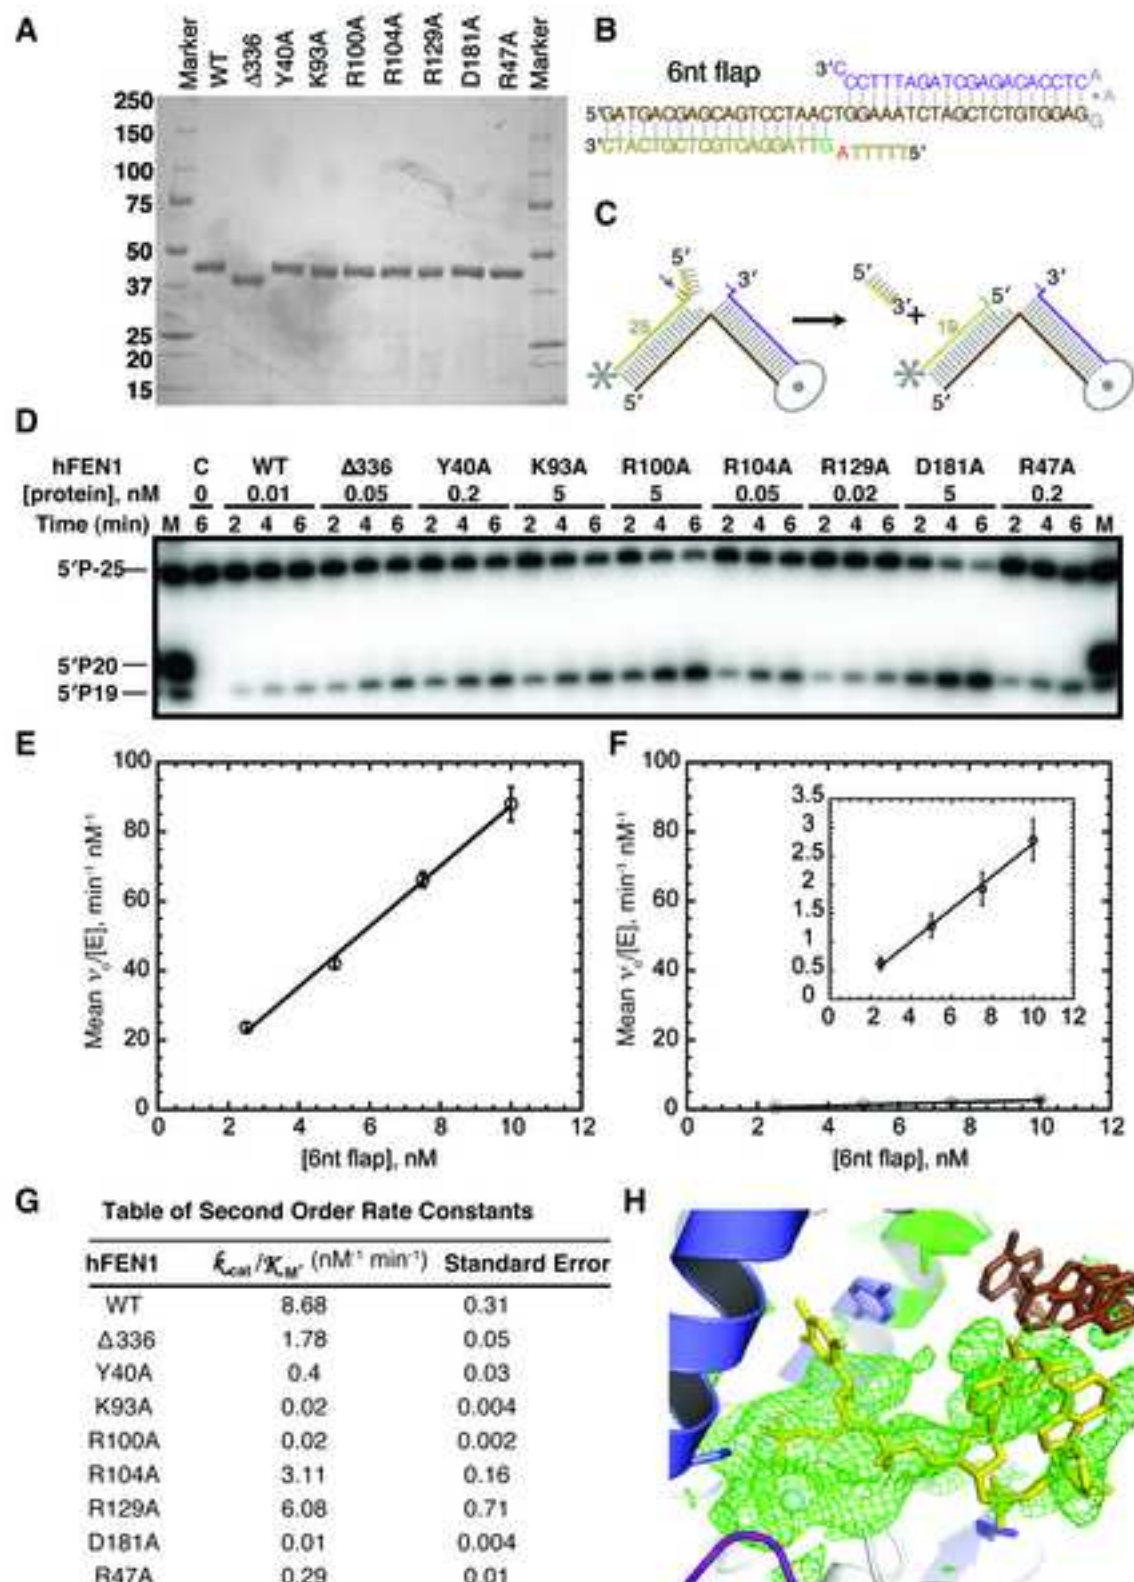

Tsutakawa et al  
Fig S4

30 nt DNA bubble

A<sup>A</sup> GCGGGGCAGACAACGTGGCGCTG<sup>TTTTTTTTTTTTTTTTTTTTTTTTTTTTTTTTTTTTTTTT</sup>GTGTCCTAGCACAGCGTATG3'  
g<sup>CGC</sup>CCCGTCTGTGTCACCGCGAC<sup>CCCCCCCCCCCCCCCCCCCCCCCCCCCCCCCCCCCC</sup>CACAGGATCGTGTGCGCATAc5'  
5'3'

Double flap

3' CCTGAGACGGAGTTTCAATCCTGACGAACTGTAG 5'  
5' GGACTCTGCCTCAAGACGGTAGTCAACGTG 3'  
3' CCTGCCATCAGTTGCAC 5'
